# Supplementary material for: Diversity in growth patterns among strains of the lethal fungal pathogen Batrachochytrium dendrobatidis across extended thermal optima
Source: PubMed Central journal article supplement (PMC5487841; doi:10.1007/s00442-017-3866-8), 2017-04-19
Supplement: 442_2017_3866_MOESM1_ESM.pdf [file 442_2017_3866_MOESM1_ESM.pdf]

Supplementary Material to:  
Diversity in growth patterns among isolates of the lethal fungal pathogen  
*Batrachochytrium dendrobatidis* across extended thermal optima

<sup>a</sup>Department of Biology, University of Nevada- Reno, Reno, Nevada 87801, USA

<sup>b</sup>Department of Integrative Biology, University of South Florida, Tampa, FL 33620, USA

<sup>c</sup>Department of Statistics, Virginia Polytechnic Institute and State University, Blacksburg, VA, 24061, USA

<sup>d</sup>Department of Biology, University of Washington, Seattle, WA 98195, USA

<sup>e</sup>New Mexico Tech, Department of Biology, 801 Leroy Place, Socorro, NM 87801, USA

<sup>f</sup>Department of Environmental Science, Policy and Management, University of California- Berkeley, Berkeley, California  
94720-3144, USA

<sup>g</sup>corresponding author: jvoyles@unr.edu, Phone: 720-883-2341

## Abstract

This document contains supplementary methods, results, and figures, as described in the main text of “Diversity in growth patterns among isolates of the lethal fungal pathogen *Batrachochytrium dendrobatidis* across extended thermal optima”.

## 1. Freeze Shock Experiment

|   | $r$                     | $K$                     | $d$                  | $m$                          |
|---|-------------------------|-------------------------|----------------------|------------------------------|
| F | 0.248 ( 0.138 - 0.363 ) | 0.221 ( 0.205 - 0.239 ) | 6.68 ( 5.25 - 7.76 ) | 8e-04 ( 7.4e-08 - 0.00239 )  |
| C | 0.278 ( 0.227 - 0.327 ) | 0.215 ( 0.208 - 0.222 ) | 2.54 ( 2.04 - 3.03 ) | 0.001 ( 2.79e-09 - 0.00301 ) |

Table 1: CJB5-2 isolate

|   | $r$                     | $K$                     | $d$                  | $m$                             |
|---|-------------------------|-------------------------|----------------------|---------------------------------|
| F | 0.243 ( 0.185 - 0.3 )   | 0.195 ( 0.186 - 0.204 ) | 7.38 ( 6.83 - 7.89 ) | 0.000885 ( 6.81e-08 - 0.00259 ) |
| C | 0.343 ( 0.298 - 0.391 ) | 0.173 ( 0.17 - 0.175 )  | 3.06 ( 2.76 - 3.35 ) | 0.001 ( 1.98e-07 - 0.003 )      |

Table 2: LFT isolate

|   | $r$                   | $K$                     | $d$                  | $m$                             |
|---|-----------------------|-------------------------|----------------------|---------------------------------|
| F | 0.43 ( 0.377 - 0.48 ) | 0.209 ( 0.207 - 0.212 ) | 2.8 ( 2.53 - 3.05 )  | 0.000814 ( 1.67e-08 - 0.00241 ) |
| C | 3.58 ( 0.566 - 13.4 ) | 0.202 ( 0.199 - 0.204 ) | 2.79 ( 1.61 - 3.93 ) | 0.000684 ( 8.68e-09 - 0.0022 )  |

Table 3: UM-142 isolate

## 2. Heat Shock Experiment

|   | $r$                     | $K$                     | $d$                  | $m$                          |
|---|-------------------------|-------------------------|----------------------|------------------------------|
| H | 0.536 ( 0.402 - 0.688 ) | 0.262 ( 0.242 - 0.283 ) | 2.9 ( 1.61 - 3.55 )  | 0.001 ( 5.04e-09 - 0.00304 ) |
| C | 0.573 ( 0.385 - 0.849 ) | 0.187 ( 0.173 - 0.202 ) | 2.72 ( 1.69 - 3.57 ) | 0.001 ( 1.58e-07 - 0.00299 ) |

Table 4: CJB isolate

|   | $r$                     | $K$                     | $d$                       | $m$                            |
|---|-------------------------|-------------------------|---------------------------|--------------------------------|
| H | 0.492 ( 0.354 - 0.637 ) | 0.277 ( 0.265 - 0.291 ) | 0.573 ( 0.000107 - 1.23 ) | 0.001 ( 1.39e-07 - 0.00303 )   |
| C | 0.629 ( 0.438 - 0.809 ) | 0.257 ( 0.24 - 0.278 )  | 3.27 ( 2.17 - 3.73 )      | 0.000995 ( 5.3e-08 - 0.00299 ) |

Table 5: LFT isolate

|   | $r$                     | $K$                     | $d$                  | $m$                            |
|---|-------------------------|-------------------------|----------------------|--------------------------------|
| H | 0.463 ( 0.276 - 0.606 ) | 0.377 ( 0.301 - 0.483 ) | 3.42 ( 2.52 - 4.61 ) | 0.00102 ( 3.63e-08 - 0.00309 ) |
| C | 0.803 ( 0.688 - 0.922 ) | 0.305 ( 0.291 - 0.32 )  | 3.62 ( 3.48 - 3.76 ) | 0.001 ( 3.31e-08 - 0.00299 )   |

Table 6: UM isolate

### 3. Temperature Gradient Experiment

|       | $r$                           | $K$                     | $d$                  | $m$                              |
|-------|-------------------------------|-------------------------|----------------------|----------------------------------|
| 2C    | 0.0871 ( 0.0792 - 0.0947 )    | 0.367 ( 0.35 - 0.386 )  | 37.8 ( 37.2 - 38.4 ) | 3.34e-05 ( 1.42e-09 - 9.85e-05 ) |
| 3C    | 0.132 ( 0.123 - 0.141 )       | 0.322 ( 0.316 - 0.328 ) | 31.9 ( 31.4 - 32.3 ) | 6.25e-05 ( 8.98e-10 - 0.000183 ) |
| 4C    | 0.129 ( 0.118 - 0.144 )       | 0.298 ( 0.293 - 0.303 ) | 25.3 ( 24.7 - 26.5 ) | 7.53e-05 ( 2.51e-09 - 0.000223 ) |
| 5C    | 0.145 ( 0.136 - 0.155 )       | 0.453 ( 0.441 - 0.465 ) | 19 ( 18.6 - 19.4 )   | 0.000115 ( 4.46e-09 - 0.000337 ) |
| 12C   | 0.133 ( 0.125 - 0.142 )       | 0.346 ( 0.339 - 0.354 ) | 3.12 ( 2.63 - 3.56 ) | 0.0012 ( 7.88e-08 - 0.00357 )    |
| 21C   | 0.14 ( 0.13 - 0.15 )          | 0.374 ( 0.357 - 0.393 ) | 1.18 ( 1 - 1.44 )    | 0.00106 ( 5.63e-08 - 0.00313 )   |
| 26C   | 0.129 ( 0.118 - 0.141 )       | 0.336 ( 0.318 - 0.355 ) | 1.09 ( 1 - 1.26 )    | 0.000982 ( 2.08e-09 - 0.00295 )  |
| 27C   | 0.0148 ( 0.012 - 0.0182 )     | 0.479 ( 0.323 - 0.6 )   | 1.13 ( 1 - 1.4 )     | 0.000717 ( 1.23e-07 - 0.00213 )  |
| 28C   | 0.00597 ( 0.00378 - 0.00827 ) | 0.455 ( 0.276 - 0.6 )   | 1.28 ( 1 - 1.87 )    | 0.000652 ( 2.64e-08 - 0.00194 )  |
| 28.mC | 0.0121 ( 0.00944 - 0.0151 )   | 0.491 ( 0.338 - 0.6 )   | 1.67 ( 1 - 2.54 )    | 0.000934 ( 6.73e-08 - 0.00282 )  |

Table 7: CJB5-2 isolate

|       | $r$                            | $K$                      | $d$                  | $m$                              |
|-------|--------------------------------|--------------------------|----------------------|----------------------------------|
| 2C    | 0.0042 ( 0.00305 - 0.00649 )   | 0.361 ( 0.173 - 0.585 )  | 9.41 ( 6.05 - 12.9 ) | 0.00348 ( 0.000681 - 0.00698 )   |
| 3C    | 0.0211 ( 0.00645 - 0.0309 )    | 0.139 ( 0.122 - 0.188 )  | 14.5 ( 9.15 - 18 )   | 0.000273 ( 8.28e-09 - 0.000826 ) |
| 4C    | 0.0525 ( 0.0416 - 0.064 )      | 0.123 ( 0.121 - 0.125 )  | 19.4 ( 17.3 - 21.4 ) | 0.000126 ( 6.14e-09 - 0.000382 ) |
| 5C    | 0.0437 ( 0.0359 - 0.0518 )     | 0.257 ( 0.23 - 0.288 )   | 8.73 ( 7.12 - 10.4 ) | 0.00613 ( 3.57e-07 - 0.0122 )    |
| 12C   | 0.134 ( 0.128 - 0.141 )        | 0.282 ( 0.278 - 0.286 )  | 3.37 ( 3.03 - 3.71 ) | 0.00389 ( 8.83e-09 - 0.0107 )    |
| 21C   | 0.207 ( 0.198 - 0.217 )        | 0.215 ( 0.213 - 0.218 )  | 1.62 ( 1.44 - 1.8 )  | 0.00498 ( 1.45e-07 - 0.0139 )    |
| 26C   | 0.0623 ( 0.0504 - 0.0762 )     | 0.444 ( 0.33 - 0.582 )   | 1.09 ( 1 - 1.28 )    | 0.000965 ( 3.07e-08 - 0.00289 )  |
| 27C   | 0.0113 ( 0.00878 - 0.014 )     | 0.49 ( 0.337 - 0.6 )     | 1.26 ( 1 - 1.78 )    | 0.000765 ( 2.33e-08 - 0.00229 )  |
| 28C   | 0.00189 ( 3.87e-08 - 0.00395 ) | 0.387 ( 0.149 - 0.6 )    | 4.11 ( 1 - 16.7 )    | 0.000544 ( 6.46e-09 - 0.00175 )  |
| 28.mC | 0.00277 ( 0.000487 - 0.00586 ) | 0.0199 ( 0.01 - 0.0402 ) | 19.6 ( 12.3 - 24.7 ) | 0.000581 ( 1.85e-08 - 0.00138 )  |

Table 8: LFT isolate

|       | $r$                           | $K$                      | $d$                  | $m$                              |
|-------|-------------------------------|--------------------------|----------------------|----------------------------------|
| 2C    | 0.147 ( 0.142 - 0.152 )       | 0.359 ( 0.355 - 0.362 )  | 25.2 ( 25 - 25.5 )   | 4.26e-05 ( 1.7e-09 - 0.000128 )  |
| 3C    | 0.211 ( 0.187 - 0.231 )       | 0.325 ( 0.323 - 0.328 )  | 22.3 ( 21.4 - 23 )   | 4.73e-05 ( 2.24e-09 - 0.000142 ) |
| 4C    | 0.215 ( 0.199 - 0.253 )       | 0.315 ( 0.312 - 0.317 )  | 17.7 ( 17.3 - 18.9 ) | 7.34e-05 ( 6.75e-09 - 0.000224 ) |
| 5C    | 0.218 ( 0.207 - 0.231 )       | 0.343 ( 0.338 - 0.348 )  | 18.8 ( 18.5 - 19.1 ) | 0.000215 ( 8.61e-09 - 0.000627 ) |
| 12C   | 0.188 ( 0.174 - 0.203 )       | 0.281 ( 0.277 - 0.286 )  | 4.52 ( 4.12 - 4.91 ) | 0.00232 ( 2.34e-08 - 0.00656 )   |
| 21C   | 0.254 ( 0.243 - 0.265 )       | 0.222 ( 0.22 - 0.224 )   | 1.83 ( 1.69 - 1.98 ) | 0.00278 ( 1.44e-07 - 0.00838 )   |
| 26C   | 0.103 ( 0.0927 - 0.115 )      | 0.547 ( 0.481 - 0.6 )    | 1.78 ( 1 - 2.56 )    | 0.000994 ( 1.74e-08 - 0.00296 )  |
| 27C   | 0.0153 ( 0.0129 - 0.0181 )    | 0.499 ( 0.354 - 0.6 )    | 1.21 ( 1 - 1.64 )    | 0.000801 ( 4.5e-08 - 0.00239 )   |
| 28C   | 0.00473 ( 0.00175 - 0.00841 ) | 0.0175 ( 0.01 - 0.0211 ) | 19.7 ( 19.1 - 20.4 ) | 0.000109 ( 3.14e-09 - 0.000327 ) |
| 28.mC | 0.0397 ( 0.036 - 0.0439 )     | 0.556 ( 0.479 - 0.6 )    | 2.73 ( 1.42 - 4.07 ) | 0.00102 ( 1.07e-07 - 0.00306 )   |

Table 9: UM-142 isolate
